# Supplementary material for: Mechanistic interpretation of selective catalytic hydrogenation and isomerization of alkenes and dienes by ligand deactivated Pd nanoparticles
Source: Royal Society of Chemistry journal article supplement (doi:10.1039/c5nr05090a), 2015-01-01
Supplement: c5nr05090a1.pdf [file c5nr05090a1.pdf]

**Mechanistic Interpretation of Selective Catalytic  
Hydrogenation and Isomerization of Alkenes and Dienes by  
Ligand Deactivated Pd Nanoparticles**

Jie S. Zhu and Young-Seok Shon

## 1. Materials and Instrumentation

All chemicals purchased from Sigma-Aldrich were reagent grade and used without further purification. Deuterated  $\text{CDCl}_3$  was purchased from Cambridge Isotope Laboratories and stored over 4 Å molecular sieves. Nanopure  $\text{H}_2\text{O}$  was obtained by purification to 18.2 MΩ resistance using a Barnstead NANOpure Diamond Life Science (UV/UF) purification system equipped with a D50280 Organic free Ro/Dis filter. NMR experiments were performed using Bruker 300 or 400 MHz NMR instruments and processed using MestReNova. Chemical shifts were referenced to the residue solvent peaks and reported as chemical shifts in ppm ( $\delta$ ), multiplicity (s = singlet, d = doublet, t = triplet, or m = multiplet), and integration ratio. GC/MS experiments were performed using an Agilent G1701EA GC/MSD Chemstation equipped with a HP-5 fused silica capillary column with 5% phenylmethylsiloxane (30m length x 250  $\mu\text{M}$  internal diameter). He gas was used as a carrier with a flow rate of 1.5 mL/min. The injector mode was set to pulsed splitless with 2  $\mu\text{L}$  injections with injector temperature at 285°C and split flow rate of 225 mL/min. A temperature program of 45°C for 5 min, ramp to 180°C with a rate of 20°C/min, ramp to 220°C with a rate of 10°C, ramp to 295°C with a rate of 12°C/min and hold for 4 mins, ramp to 315°C with a rate of 10°C/min and hold for 3 mins. Mass spectrum was obtained in m/z range of 45-550 with a 3 minute solvent delay. The temperature of the ion source was 230°C and the temperature of the quadrapole was 150°C.

## 2. Procedure for the Preparation of Thiolate-capped PdNP:

K<sub>2</sub>PdCl<sub>4</sub> (0.1306 g, 0.4 mmol) and tetraoctylammonium bromide (1.094 g, 2 mmol) was combined in 25 ml toluene and 12 ml nanopure H<sub>2</sub>O. The solution was stirred for 10 minutes and the organic layer was separated then transferred to a 500 mL round bottom flask. Sodium S-octylthiosulfate (0.1984 g, 0.8 mmol) in 25% MeOH in nanopure H<sub>2</sub>O solution was added followed by tetraoctylammonium bromide (1.094 g, 2 mmol). This solution was stirred for 10 minutes and a freshly prepared solution of sodium borohydride (0.3026 g, 8 mmol) in 7 mL nanopure H<sub>2</sub>O was added over ~10 seconds. The bubbling black solution was stirred for 3 hours then organic layer was separated. The solvent was removed under reduced pressure at less than 30°C. The crude PdNPs transferred to a 10 mL Falcon tube and sonicated in 5 mL ethanol for 10 minute followed by 10 minutes of centrifugation. The supernatant was discarded and this process was repeated 2 times and then with acetone 3 times. The PdNPs were allowed to dry in a vacuum desiccator over night before use.

Thermal gravimetric analysis of the PdNP showed an organic weight fraction of 19.7%; Pd weight fraction 80.3% (average of two batches of particles synthesized).

The average size of the particles, based on previously optimized synthesis of dodecanethiolate-capped palladium nanoparticles,<sup>1</sup> was 2.59±1.15 nm

### 3. General procedure for the hydrogenation of alkene:

Alkene (0.5 mmol) and PdNP (3.3 mg, 5 mol%) were stirred in  $\text{CDCl}_3$  (2.5 mL) in a 50 mL round bottom flask with a rubber septum. The flask was purged with hydrogen gas for 10 minutes and the septum was quickly replaced with a polyethylene stopper. The resulting solution was then stirred for 24h. The  $\text{CDCl}_3$  was removed by evaporation and approximately 2 mL of methanol was used to transfer crude mixture into a 2 mL Eppendorf vial. The vial was centrifuged to separate the PdNP and products.

#### 4. NMR spectra and GC/MS charts

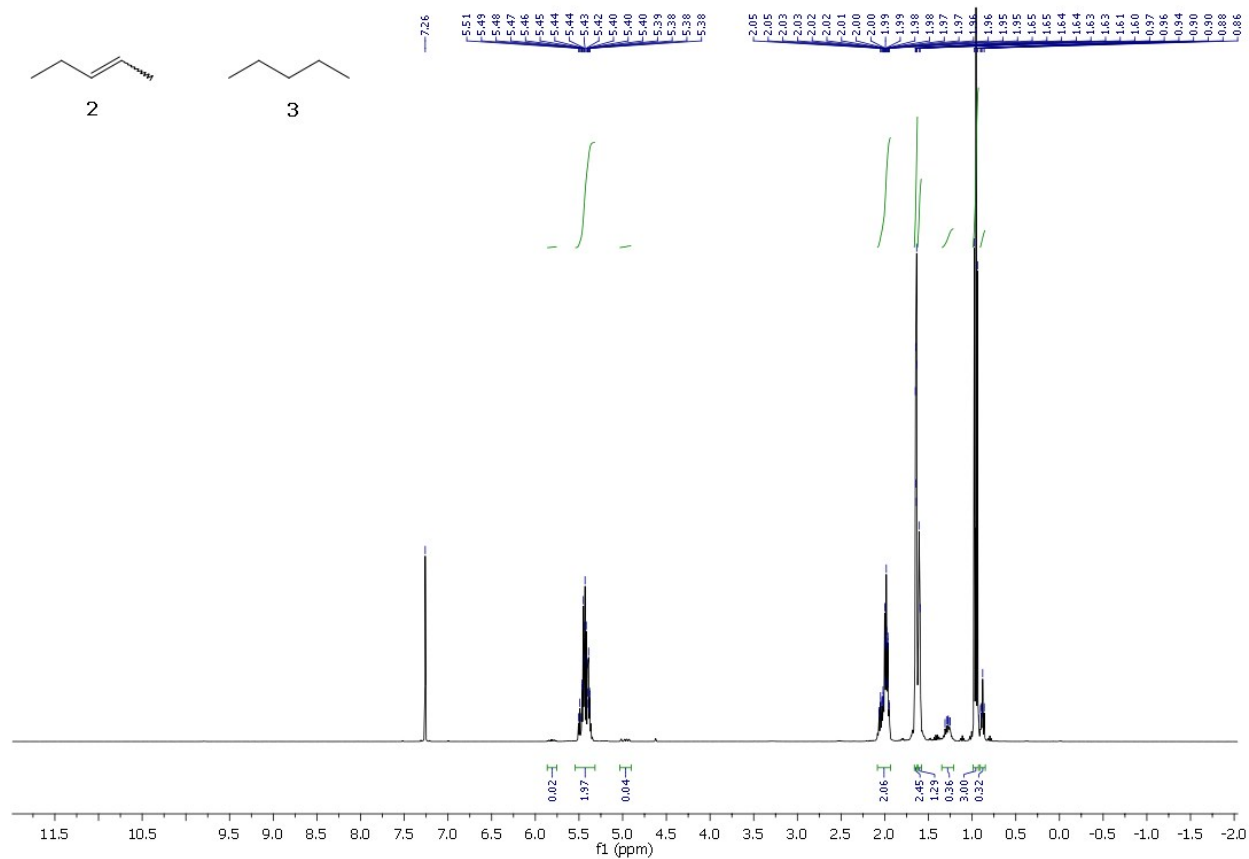

**Figure S1.** <sup>1</sup>H NMR spectrum obtained after reacting 1-pentene (**1**) with PdNP in CDCl<sub>3</sub> under H<sub>2</sub> conditions after 24 h. The spectrum shows **2** as the major product (90%) and **3** as the minor product (9%).

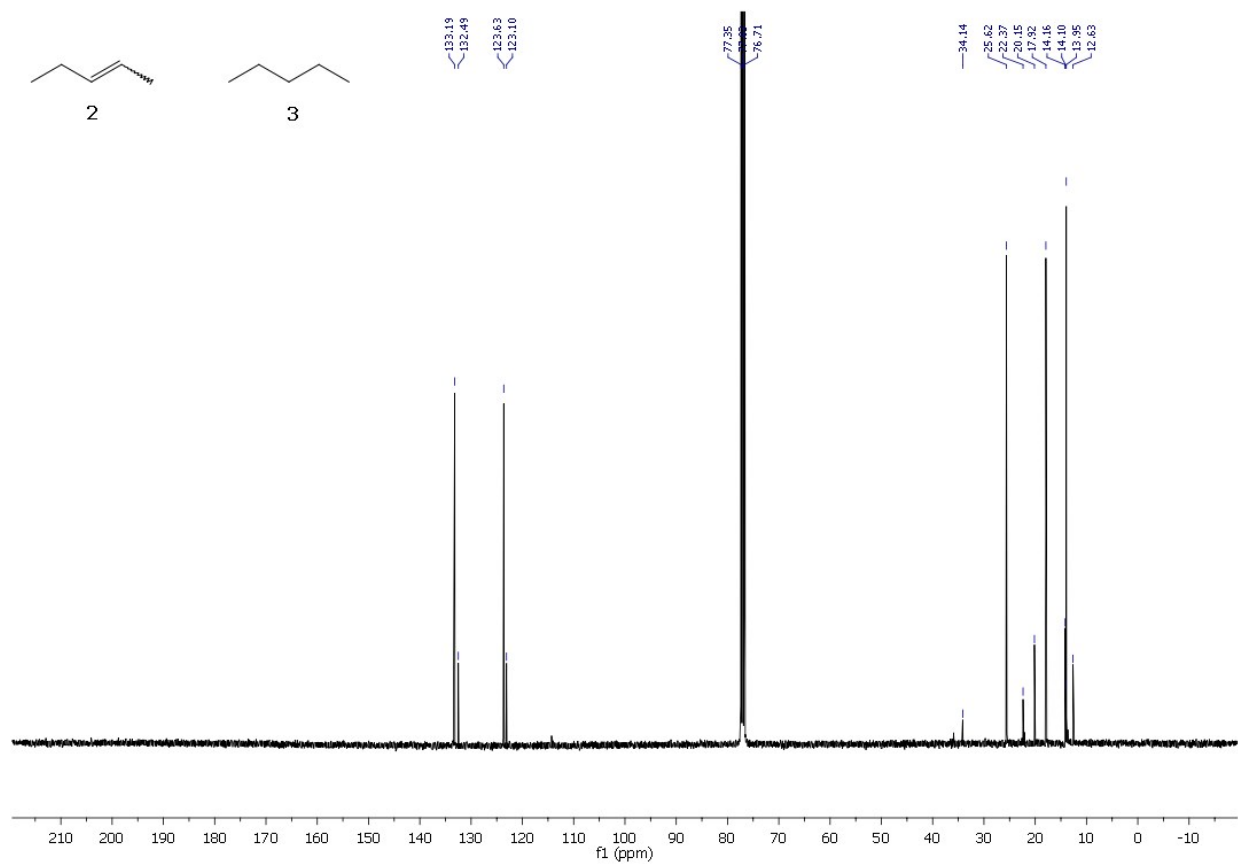

**Figure S2.**  $^{13}\text{C}$  NMR spectrum obtained after reacting 1-pentene (**1**) with PdNP in  $\text{CDCl}_3$  under  $\text{H}_2$  conditions after 24 h. The spectrum shows a mixture of *cis*- and *trans*- **2** and **3**.

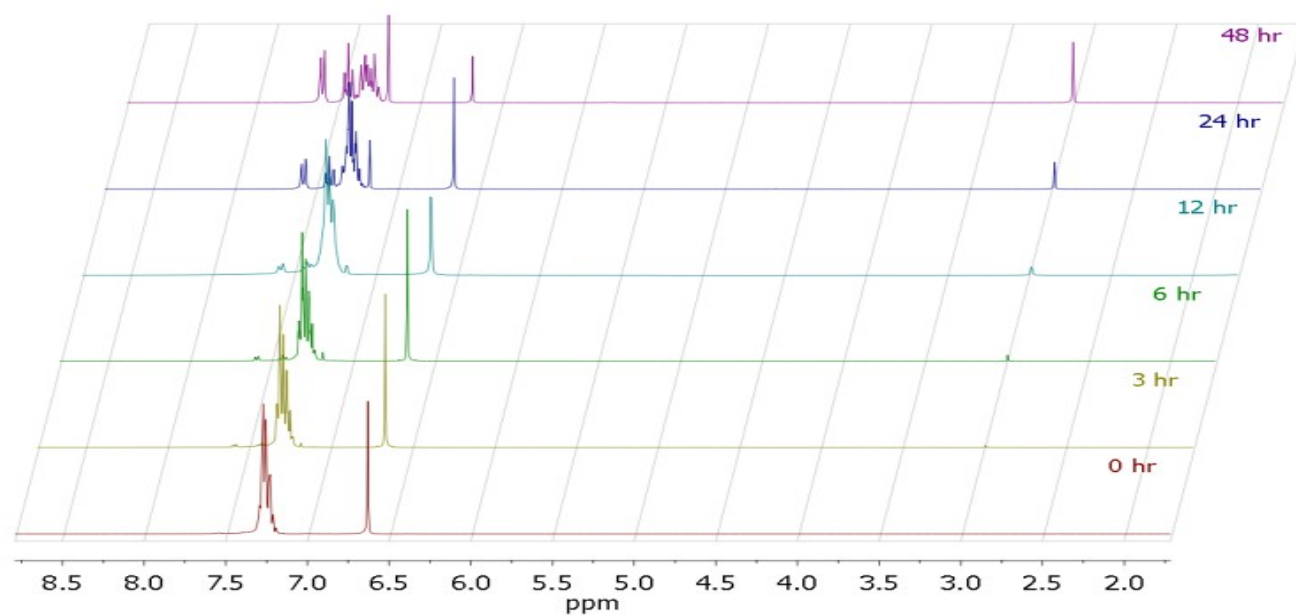

**Figure S3.** <sup>1</sup>H NMR spectra obtained after reacting *cis*-stilbene (**10**) with PdNP in CDCl<sub>3</sub> under H<sub>2</sub> conditions after 48 h at various time intervals. The spectrum shows *trans*-stilbene (**11**) as the major product and 1,2-diphenylethane (**9**) as the minor product.

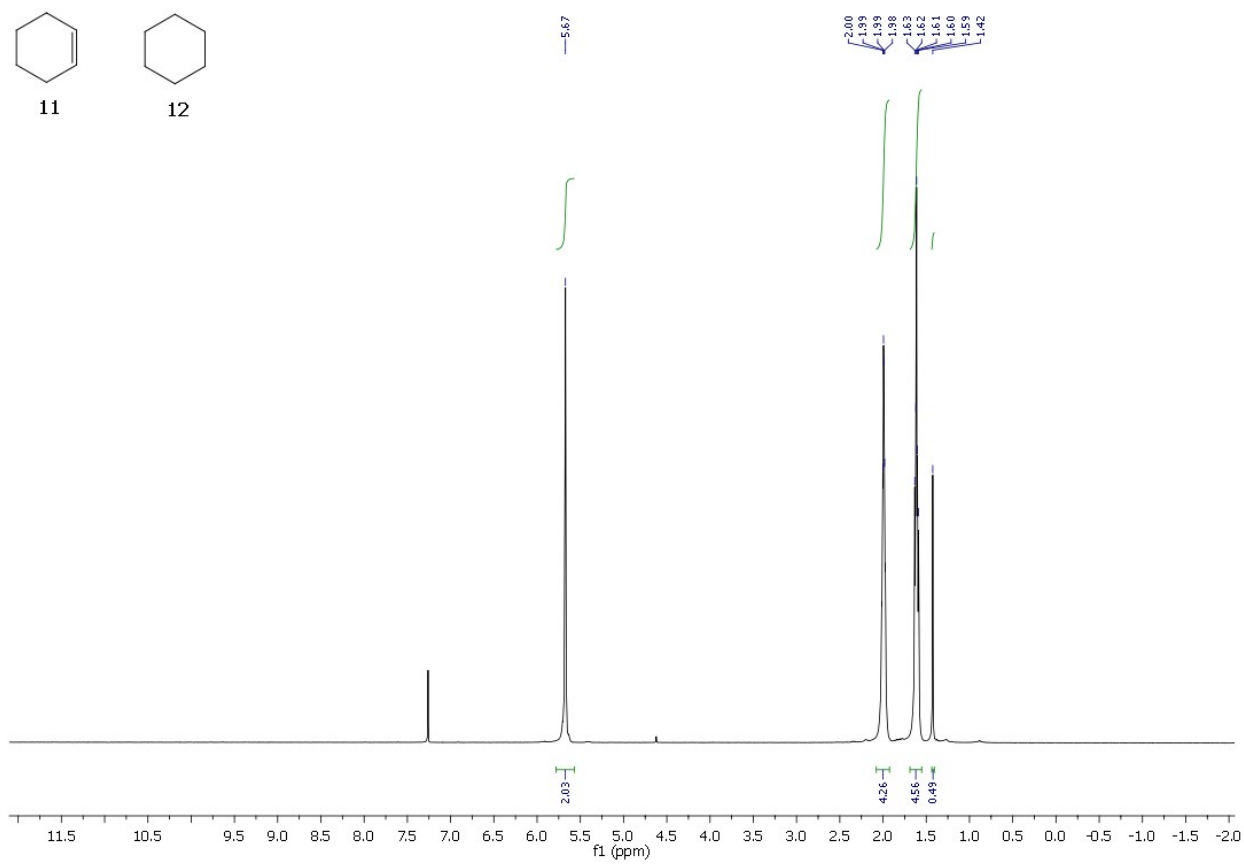

**Figure S4.** <sup>1</sup>H NMR spectrum obtained after reacting **11** with PdNP in CDCl<sub>3</sub> under H<sub>2</sub> conditions after 24 h. The spectrum shows **12** as a minor product (4%) and **11** as the unreacted starting material (96%).

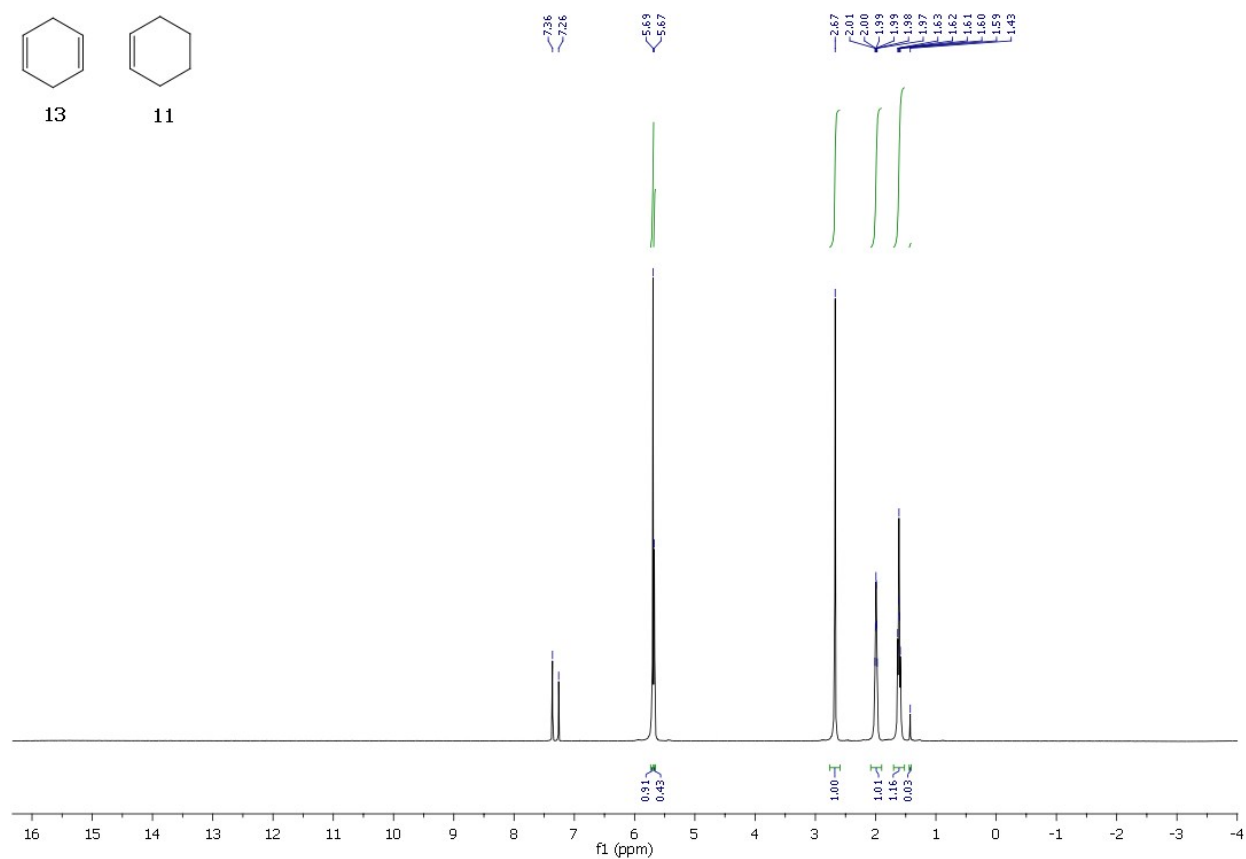

**Figure S5.**  $^1\text{H}$  NMR spectrum obtained after reacting **13** with PdNP in  $\text{CDCl}_3$  under  $\text{H}_2$  conditions after 24 h. The spectrum shows **11** as the major product (33%) and **12** as the minor product, and **13** as the unreacted starting material (67%).

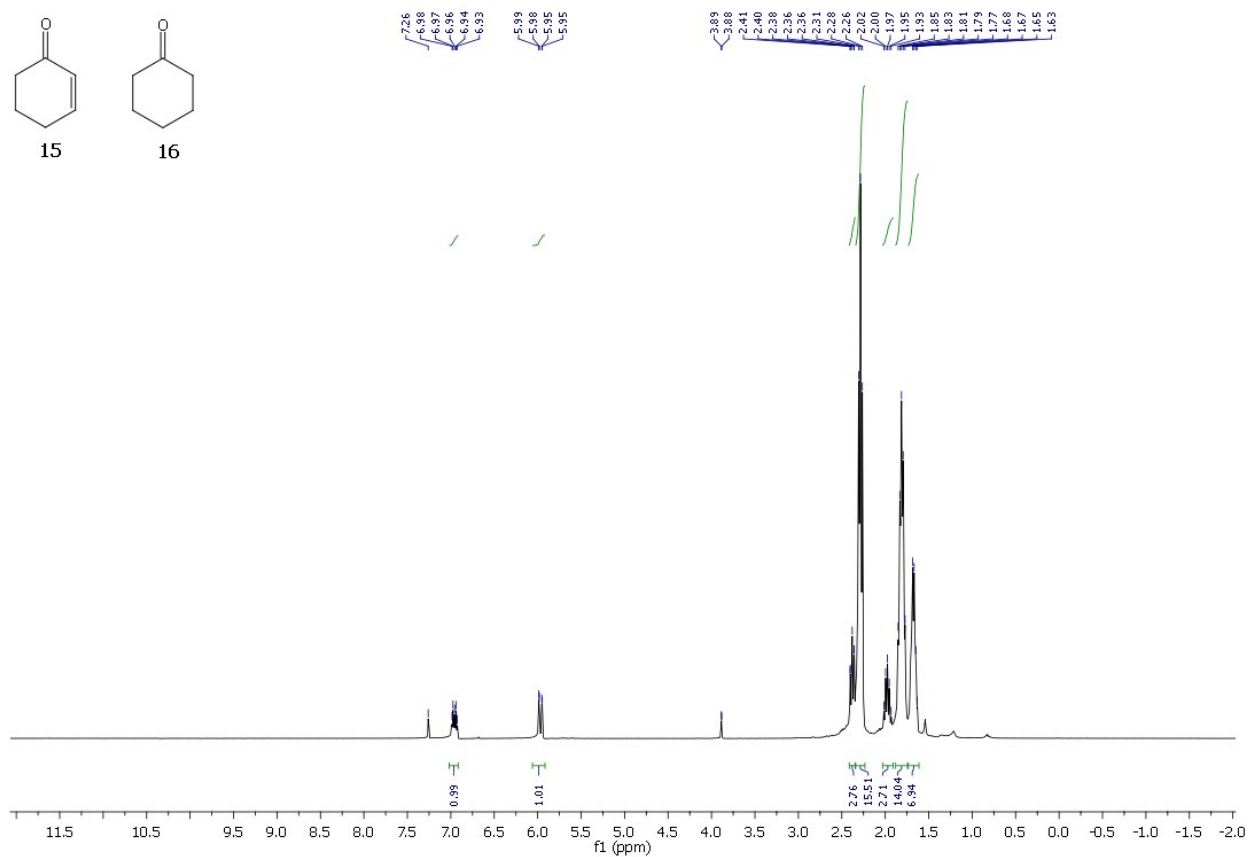

**Figure S6.**  $^1\text{H}$  NMR spectrum obtained after reacting **15** with PdNP in CDCl<sub>3</sub> under H<sub>2</sub> conditions after 24 h. The spectrum shows **16** as the major product (83%) and **15** as the unreacted starting material (17%).

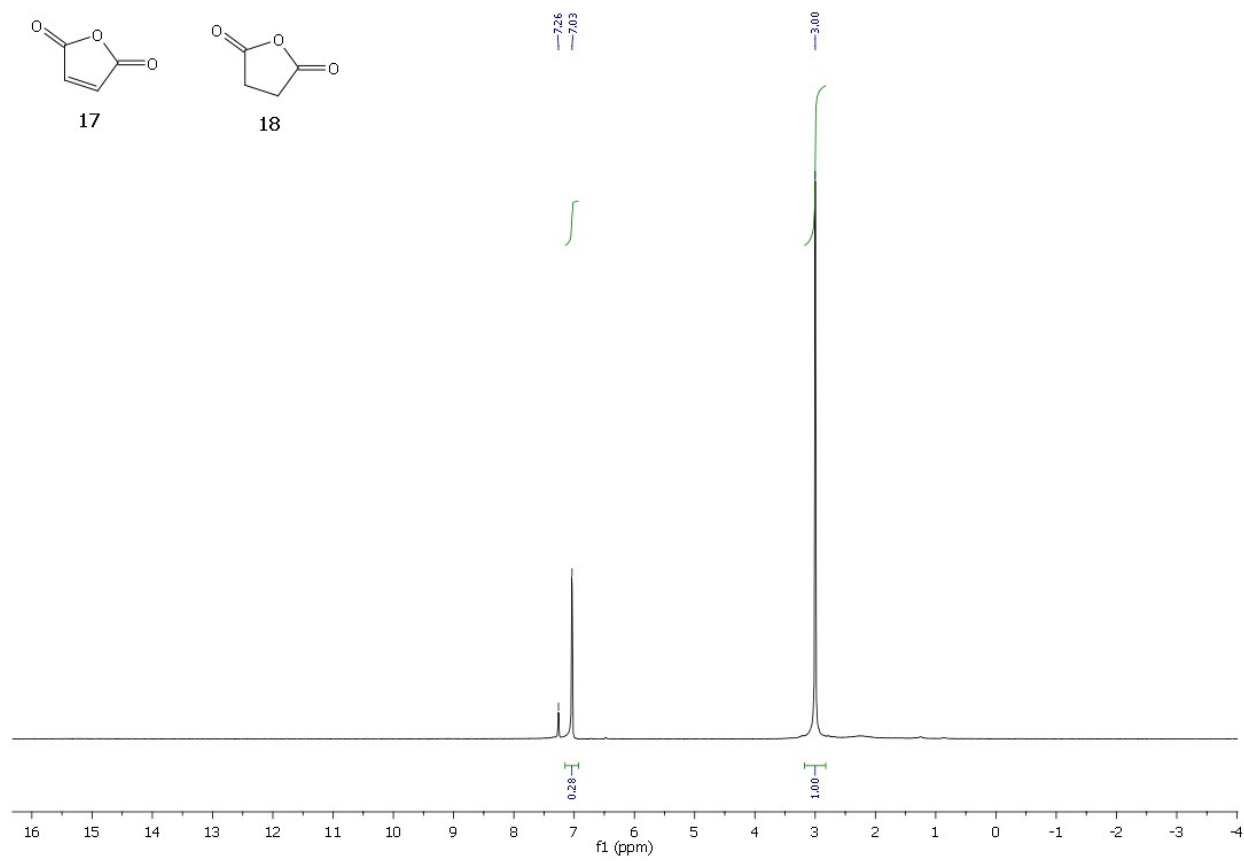

**Figure S7.** <sup>1</sup>H NMR spectrum obtained after reacting **17** with PdNP in CDCl<sub>3</sub> under H<sub>2</sub> conditions after 24 h. The spectrum shows **18** as the major product (64%) and **17** as the unreacted starting material (36%).

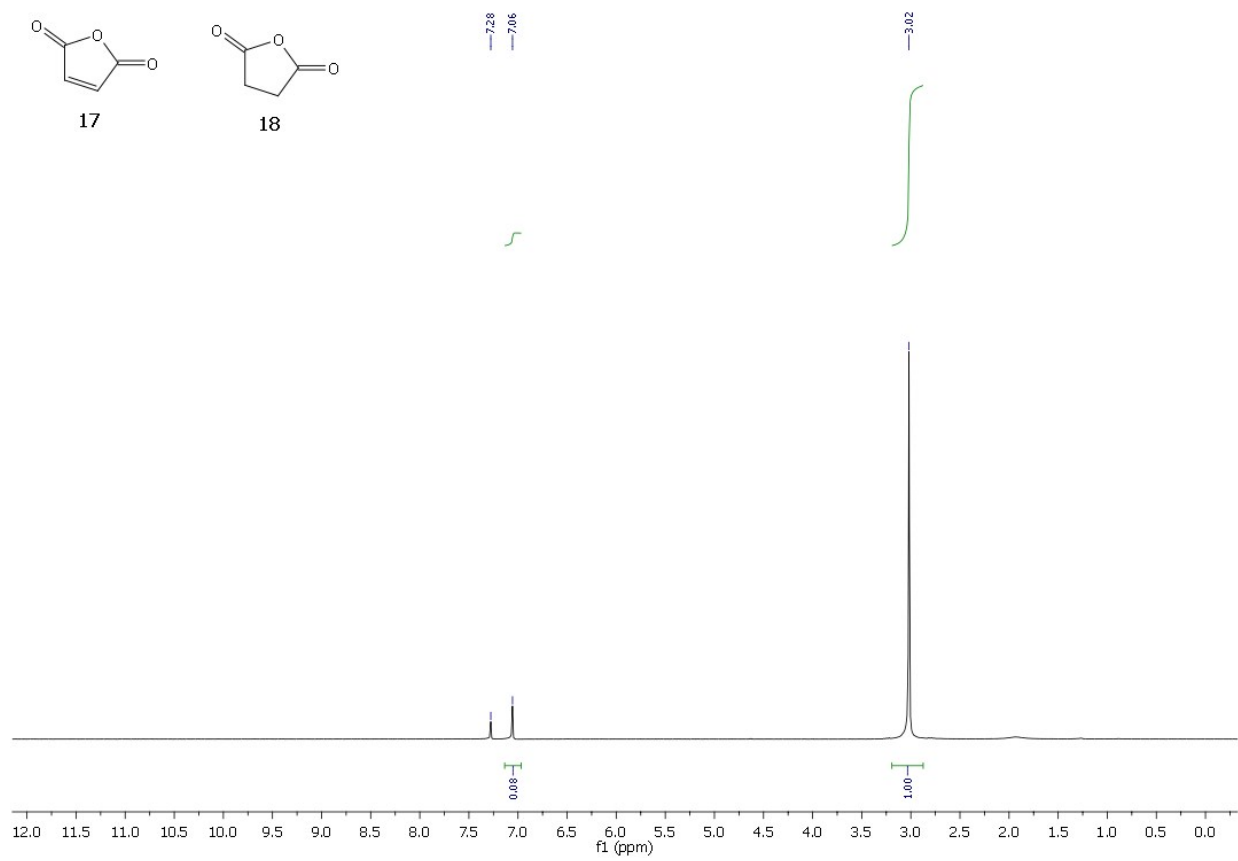

**Figure S8.**  $^1\text{H}$  NMR spectrum obtained after reacting **17** with PdNP in  $\text{CDCl}_3$  under  $\text{H}_2$  conditions after 48 h. The spectrum shows **18** as the major product (87%) and **17** as the unreacted starting material (13%).

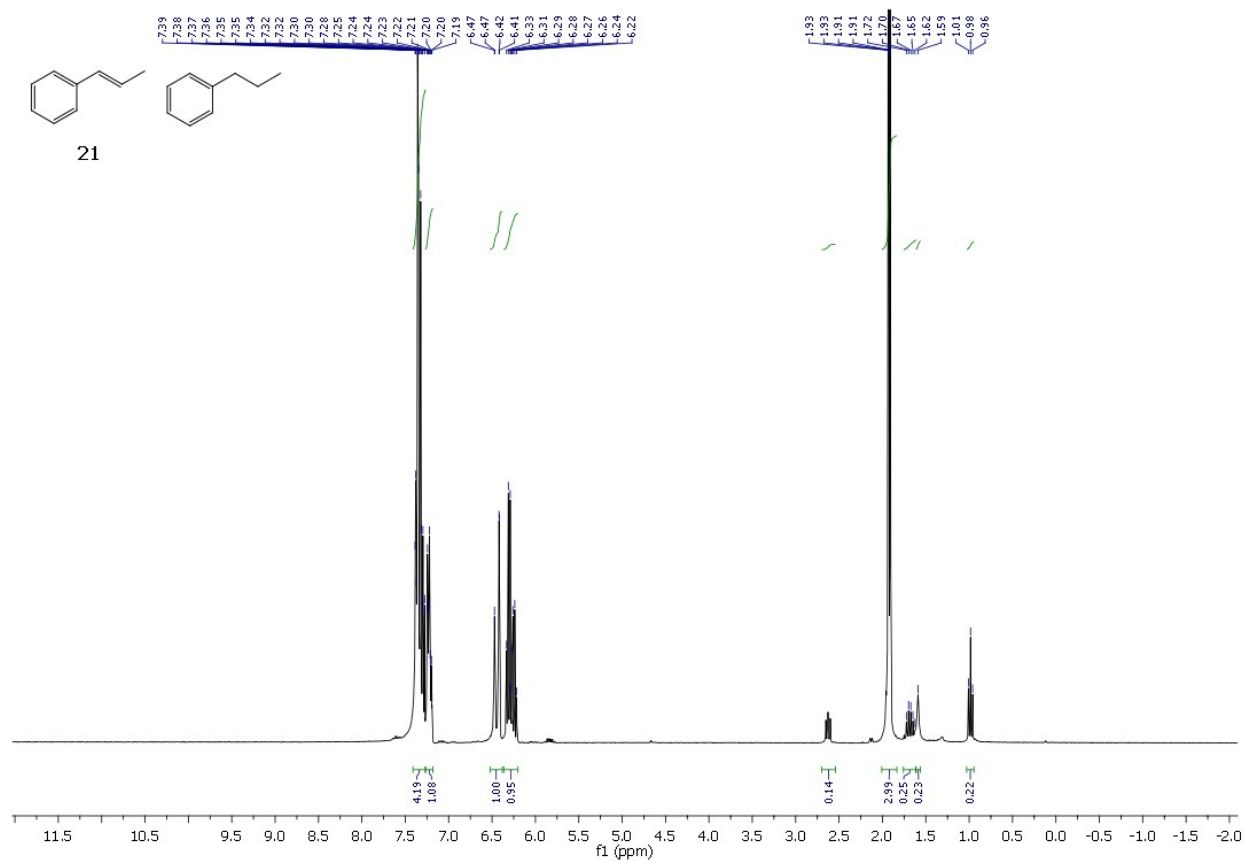

**Figure S9.** <sup>1</sup>H NMR spectrum obtained after reacting **21** with PdNP in CDCl<sub>3</sub> under H<sub>2</sub> conditions after 24 h. The spectrum shows **21** as the unreacted starting material (90%) and minute amounts of **22** (2%) and propylbenzene (8%)

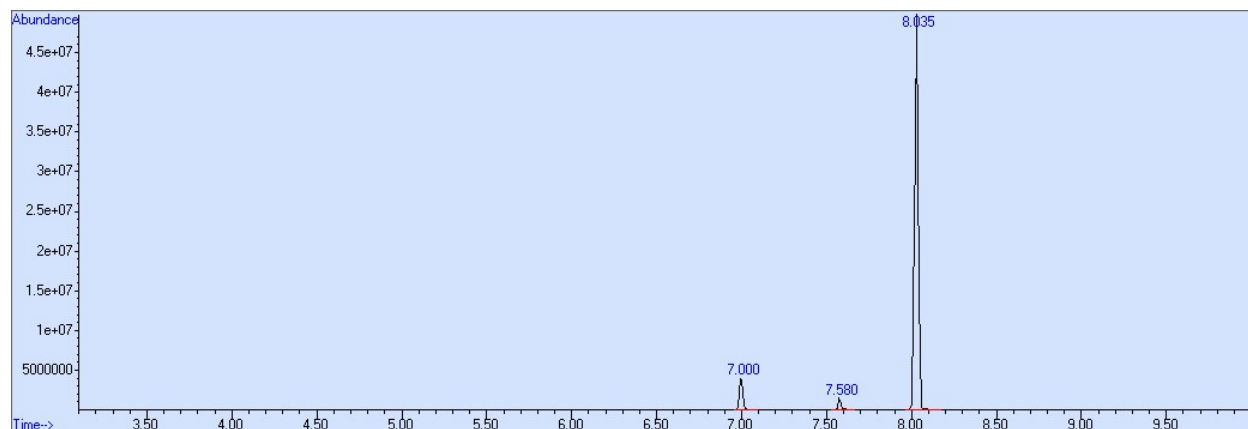

**Figure S10.** GC/MS spectrum obtained after reacting **21** with PdNP in  $\text{CDCl}_3$  under  $\text{H}_2$  conditions after 24 h. The integration of the peaks on spectrum shows **21** as the unreacted starting material (90.48%) and minute amounts of **21** (2.16%) and propylbenzene (8.73%).

| peak # | R.T. min | first scan | max scan | last scan | PK TY | peak height | corr. area | corr. % max. | % of total |
|--------|----------|------------|----------|-----------|-------|-------------|------------|--------------|------------|
| ---    | -----    | -----      | ----     | ----      | ---   | -----       | -----      | -----        | -----      |
| 1      | 7        | 345        | 349      | 358       | BB    | 4051920     | 61301260   | 8.14%        | 7.37%      |
| 2      | 7.58     | 396        | 401      | 409       | BB    | 1307357     | 17962648   | 2.39%        | 2.16%      |
| 3      | 8.035    | 435        | 441      | 454       | BB    | 45912269    | 753038115  | 100.00%      | 90.48%     |

Sum of corrected areas: 832302023

**Table S1.** Retention times and integration of the peaks shown in **Figure S9**.

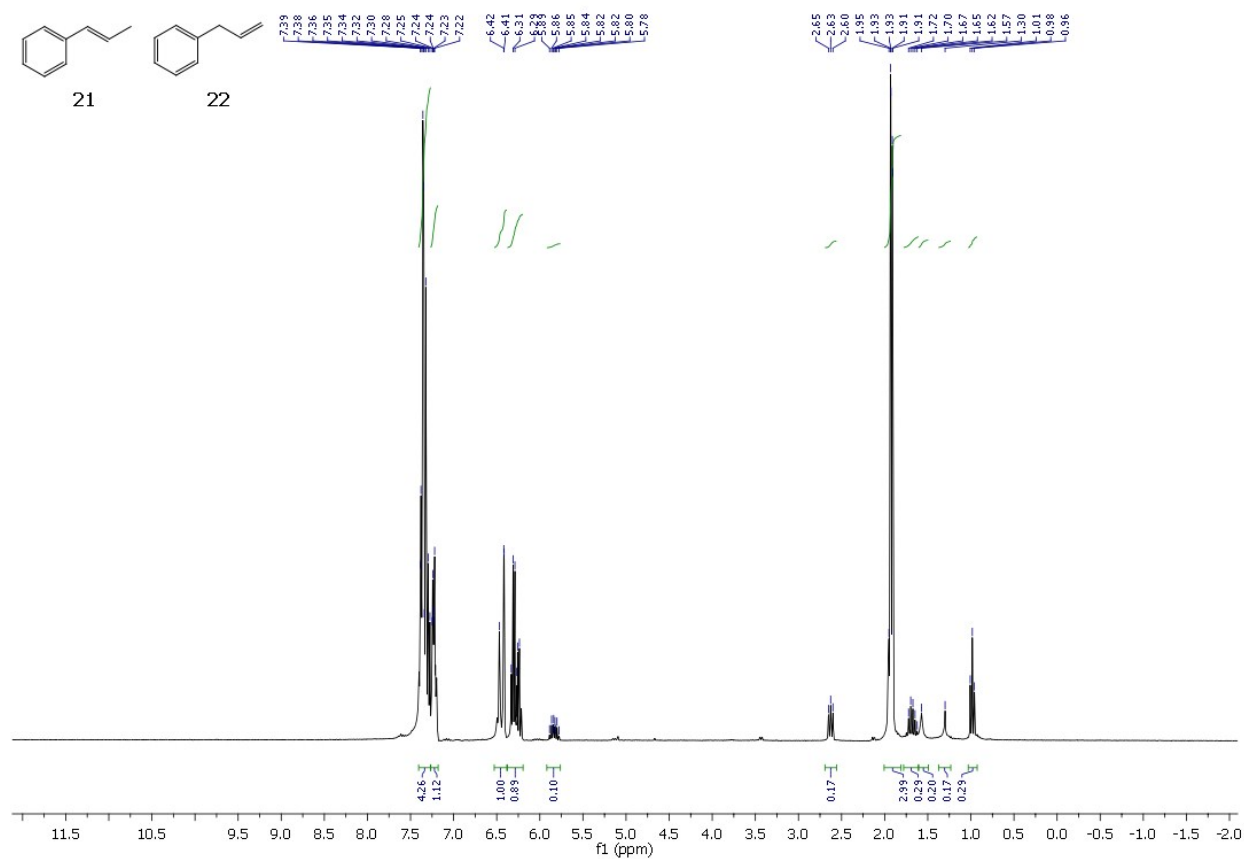

**Figure S11.**  $^1\text{H}$  NMR spectrum obtained after reacting **22** with PdNP in  $\text{CDCl}_3$  under  $\text{H}_2$  conditions after 24 h. The spectrum shows **21** as the major product (83%), propylbenzene as the minor product (9%), and unreacted **22** (8%).

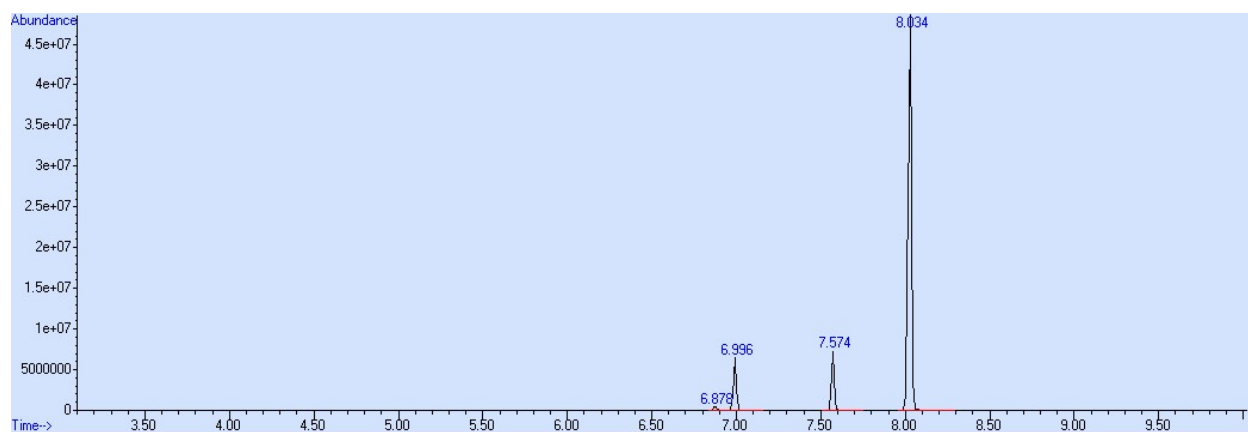

**Figure S12.** GC/MS spectrum obtained after reacting **22** with PdNP in  $\text{CDCl}_3$  under  $\text{H}_2$  conditions after 24 h. The integration of the peaks on spectrum shows **21** as the major product (82.47%), propylbenzene as the minor product (9.05%), and unreacted **22** (7.70%).

| peak # | R.T. min | first scan | max scan | last scan | PK TY | peak height | corr. area | corr. % max. | % of total |
|--------|----------|------------|----------|-----------|-------|-------------|------------|--------------|------------|
| ---    | -----    | -----      | -----    | -----     | ---   | -----       | -----      | -----        | -----      |
| 1      | 6.878    | 334        | 338      | 344       | BV    | 404111      | 6711009    | 0.94%        | 0.77%      |
| 2      | 6.996    | 344        | 349      | 364       | VB    | 5662672     | 78523038   | 10.97%       | 9.05%      |
| 3      | 7.574    | 394        | 400      | 416       | BB    | 7145437     | 66840562   | 9.34%        | 7.70%      |
| 4      | 8.034    | 434        | 441      | 464       | BB    | 45923752    | 7.16E+08   | 100.00%      | 82.47%     |

Sum of corrected area: 867641632

**Table S2.** Retention times and integration of the peaks shown in **Figure S11**.

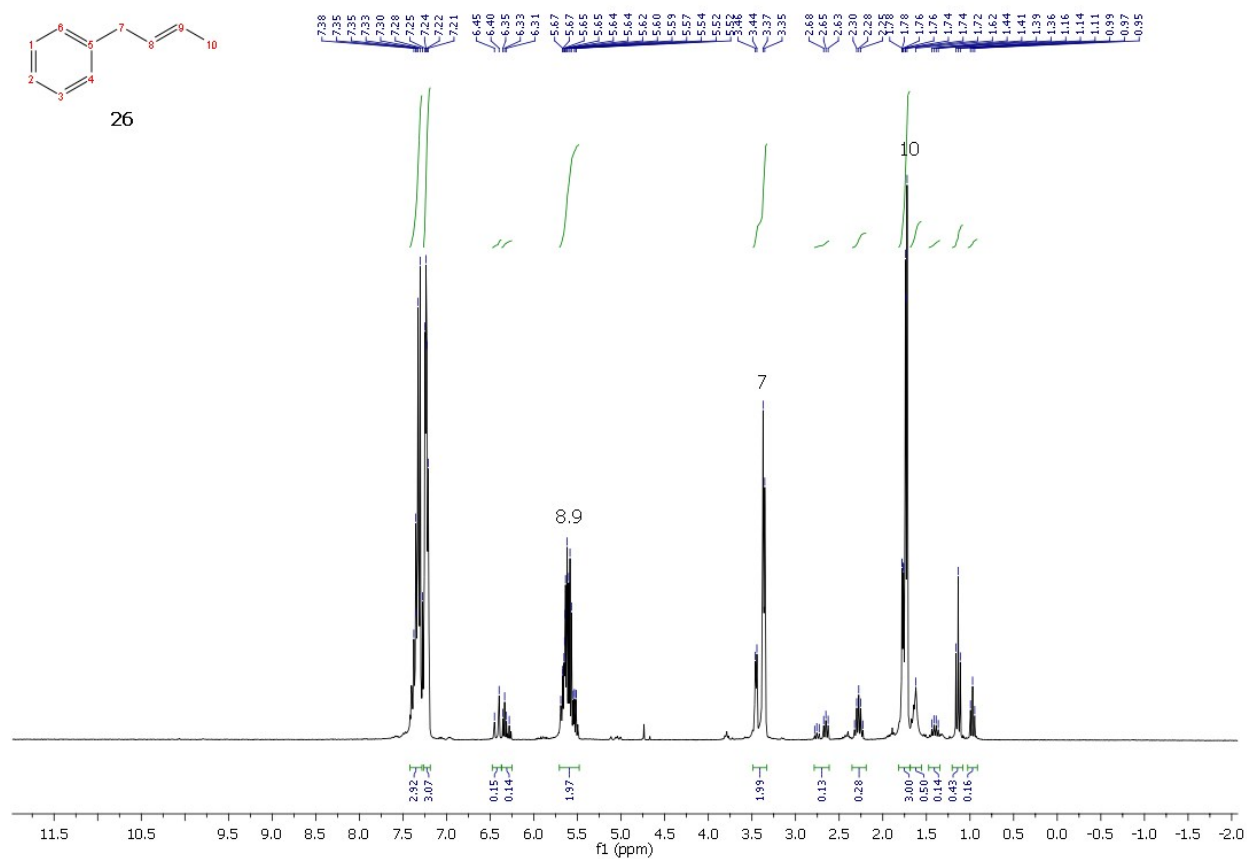

**Figure S13.**  $^1\text{H}$  NMR spectrum obtained after reacting **23** with PdNP in  $\text{CDCl}_3$  under  $\text{H}_2$  conditions after 24 h. The spectrum shows *trans*-**26** as the major product (65%).

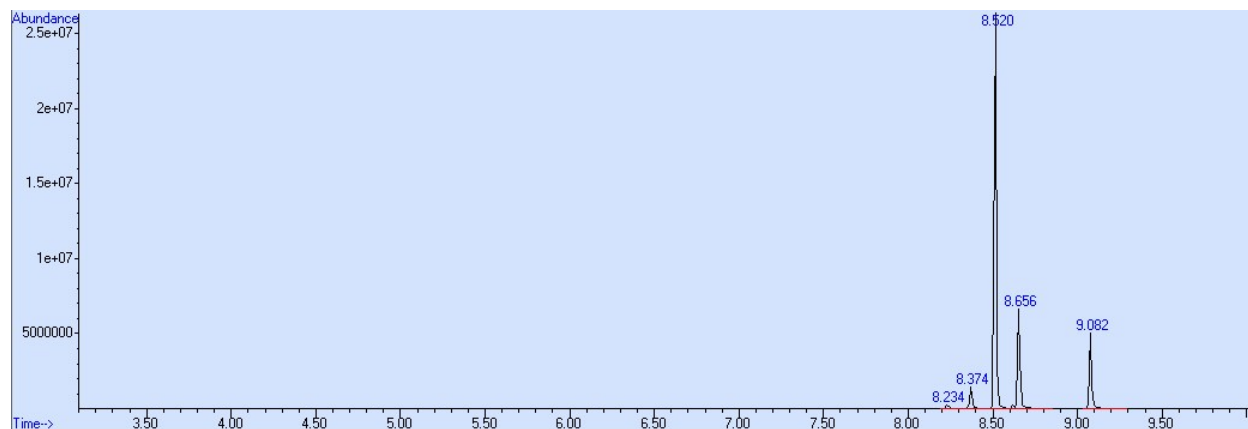

**Figure S14.** GC/MS spectrum obtained after reacting **23** with PdNP in  $\text{CDCl}_3$  under  $\text{H}_2$  conditions after 24 h. The integration of the peaks on spectrum shows *trans*-**26** as the major product (64.72%), and *cis*-**26** (18.39%), **25** (12.06%), and **27** (3.80%) as the minor products.

| peak # | R.T. min | first scan | max scan | last scan | PK TY | peak height | corr. area | corr. % max. | % of total |
|--------|----------|------------|----------|-----------|-------|-------------|------------|--------------|------------|
| ---    | -----    | -----      | ----     | ----      | ---   | -----       | -----      | -----        | -----      |
| 1      | 8.234    | 455        | 459      | 468       | BV    | 218158      | 4192691    | 1.58%        | 1.02%      |
| 2      | 8.374    | 468        | 471      | 480       | PV    | 1167863     | 15626788   | 5.87%        | 3.80%      |
| 3      | 8.52     | 480        | 484      | 491       | VV    | 23073226    | 2.66E+08   | 100.00%      | 64.72%     |
| 4      | 8.656    | 491        | 497      | 514       | VB    | 5473168     | 75629651   | 28.42%       | 18.39%     |
| 5      | 9.082    | 530        | 535      | 554       | BB    | 4372764     | 49600077   | 18.64%       | 12.06%     |

Sum of corrected areas: 411174108

**Table S3.** Retention times and integration of the peaks shown in **Figure S13**.

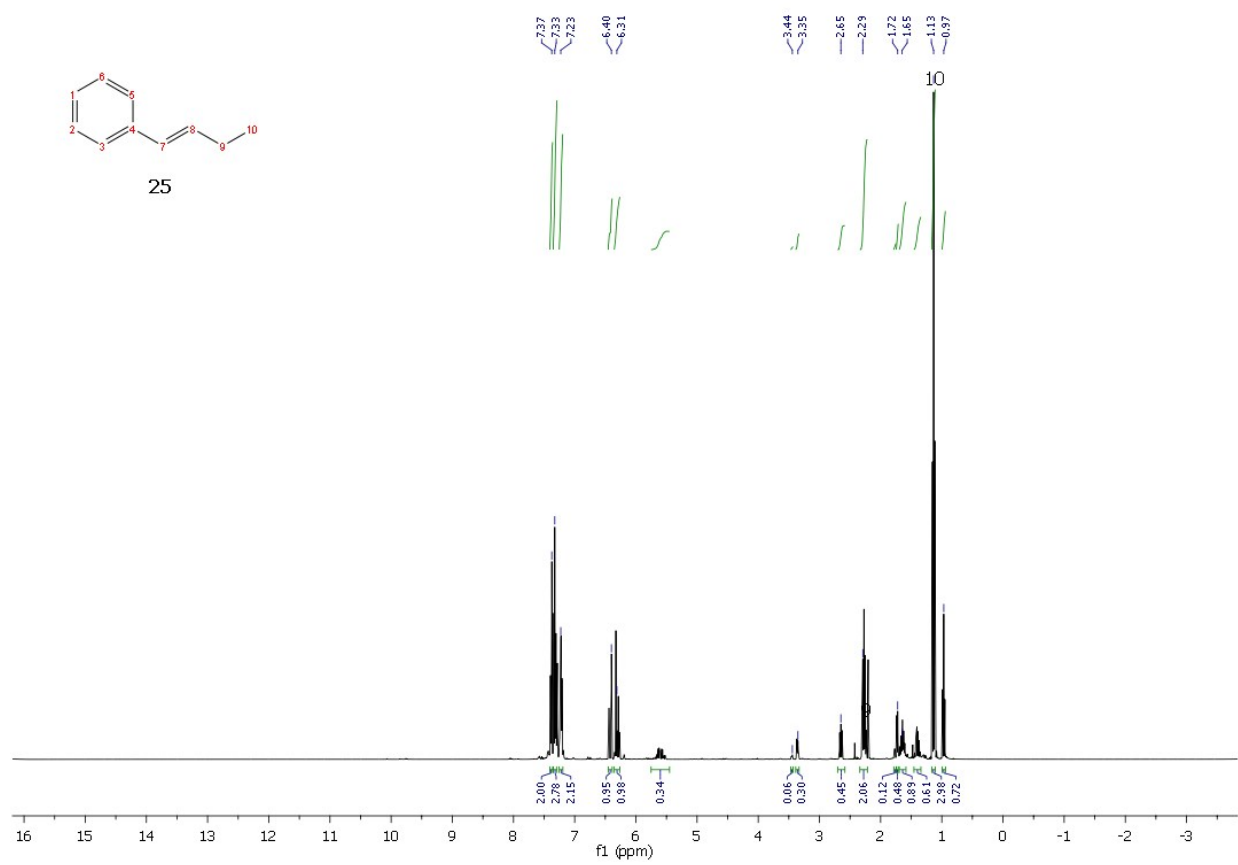

**Figure S15.** <sup>1</sup>H NMR spectrum obtained after reacting **24** with PdNP in CDCl<sub>3</sub> under H<sub>2</sub> conditions after 24 h. The spectrum shows **25** as the major product (72%).

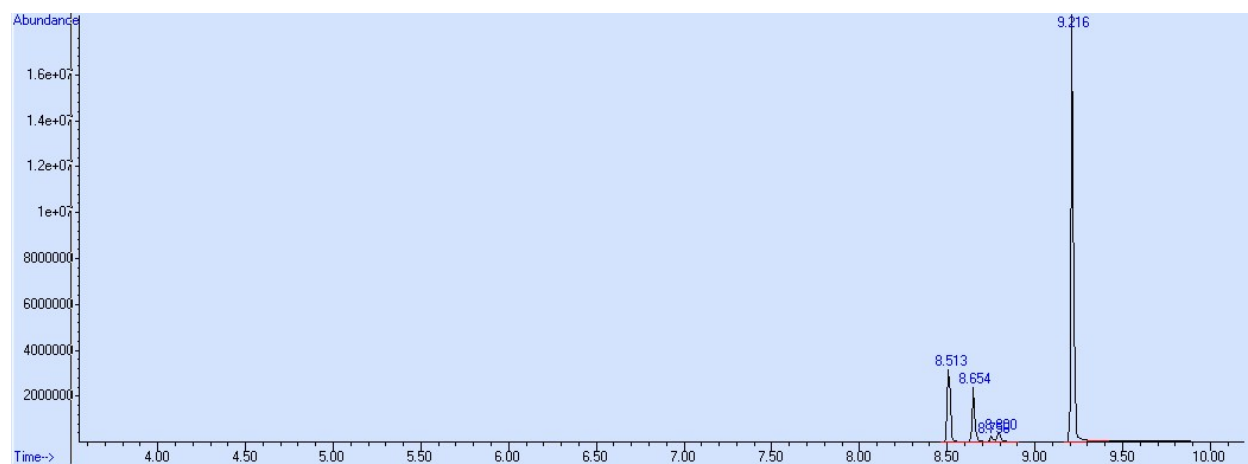

**Figure S16.** GC/MS spectrum obtained after reacting **23** with PdNP in  $\text{CDCl}_3$  under  $\text{H}_2$  conditions after 24 h. The integration of the peaks on spectrum shows **25** as the major product (71.84%), **23** (0.91%), *cis*-**26** (2.08%), *trans*-**26** (9.81%) and **27** (15.37 %) as the minor products.

| peak # | R.T. min | first scan | max scan | last scan | PK TY | peak height | corr. area | corr. % max. | % of total |
|--------|----------|------------|----------|-----------|-------|-------------|------------|--------------|------------|
| ---    | -----    | -----      | ----     | ----      | ---   | -----       | -----      | -----        | -----      |
| 1      | 8.513    | 479        | 484      | 493       | BV    | 2947632     | 38851397   | 21.39%       | 15.37%     |
| 2      | 8.654    | 493        | 496      | 503       | VV    | 1966777     | 24799639   | 13.65%       | 9.81%      |
| 3      | 8.756    | 503        | 505      | 507       | VV    | 193964      | 2298370    | 1.27%        | 0.91%      |
| 4      | 8.8      | 507        | 509      | 520       | VB    | 349513      | 5245991    | 2.89%        | 2.08%      |
| 5      | 9.216    | 542        | 546      | 565       | BV    | 15156858    | 1.82E+08   | 100.00%      | 71.84%     |

Sum of corrected areas:  
252852430

**Table S4.** Retention times and integration of the peaks shown in **Figure S15**.

## 6. References

D. J. Gavia, Y.-S. Shon, *Langmuir* **2012**, 28, 14502-14508
